# Supplementary material for: Evaluating the Role of Mashing in the Amino Acid Profiles of Worts Produced from Gluten-Free Malts
Source: MDPI journal article supplement (doi:10.3390/beverages9010010), 2023-01-28
Supplement: s1 [file s1]

Archive with 2 entries (2 files):
- Supplemental Data.xlsx
- Supplemental Figures.pdf
