# Supplementary material for: Evaluating the Role of Mashing in the Amino Acid Profiles of Worts Produced from Gluten-Free Malts
Source: MDPI journal article supplement (doi:10.3390/beverages9010010), 2023-01-28
Supplement: s1 [file s1 › Supplemental Data.xlsx]

## Sheet: Gluten Free Worts
Final Worts	Concentrations (mg/L)
L:G 6:1		Group A									Group B				Group C					Group D
	FAN	Aspartic Acid	Glutamic Acid	Asparagine	Serine	Glutamine	Threonine	Arginine	Methionine	Lysine	Histidine	Valine	Isoleucine	Leucine	Glycine	Alanine	Tyrosine	Tryptophan	Phenylalanine	Proline	GABA
Barley	201.34 ± 9.94	59.13 ± 2.48	98.09 ± 1.08	107.54 ± 62.11	60.7 ± 3.12	202.79 ± 8.3	55.14 ± 3.26	147.39 ± 7.94	28.44 ± 2.26	63.57 ± 4.83	51.04 ± 1.7	114.51 ± 6.94	63.31 ± 3.94	155.14 ± 10.74	28.26 ± 1.46	95.16 ± 5.54	95.36 ± 5.15	42.42 ± 1.44	132.4 ± 6.71	498.66 ± 10.89	34.8 ± 2.19
Millet	169.09 ± 0.34	50.3 ± 1.05	37.59 ± 0.36	108.24 ± 62.5	78.21 ± 1.06	185.4 ± 2.49	42.38 ± 1.49	120.53 ± 2.69	44.69 ± 0.98	51.25 ± 1.78	42.98 ± 1.12	81.44 ± 1.89	47.34 ± 1	150.15 ± 3.41	15.43 ± 0.44	82.9 ± 2.1	82.56 ± 2.11	29.39 ± 0.54	83.45 ± 1.49	130.95 ± 1.86	97.45 ± 2.17
Sorghum	128.75 ± 2.03	25.38 ± 0.3	55 ± 0.36	76.55 ± 44.2	54.73 ± 0.68	130.88 ± 1.94	37.35 ± 0.41	73.11 ± 1.22	16.44 ± 0.4	22.98 ± 0.47	33.84 ± 0.23	66 ± 1.04	29.93 ± 0.32	103.1 ± 0.58	22.6 ± 0.24	119.54 ± 1.33	58.4 ± 0.42	13.45 ± 0.05	55.19 ± 0.42	190.68 ± 2.95	82.44 ± 1.38
Ivory Teff	444.53 ± 6.55	189.34 ± 0.76	146.97 ± 9.85	288.04 ± 166.31	188.51 ± 4.22	391.29 ± 2.51	153.93 ± 2.58	430.58 ± 4.38	129.97 ± 3.14	275.36 ± 4.93	114.7 ± 1.43	279.31 ± 4.31	167.89 ± 3.06	368.21 ± 10.91	83 ± 1.41	286.04 ± 4.74	227.57 ± 4.16	67.97 ± 1.02	219.25 ± 5.93	203.79 ± 2.28	174.24 ± 0.43
Brown Teff	490.34 ± 4.51	282.28 ± 1.09	165.42 ± 7.02	273.29 ± 158.19	195.31 ± 1.85	331.33 ± 1.15	161.46 ± 0.09	481.85 ± 10.15	148.94 ± 0.36	321.74 ± 3.24	126.14 ± 1.61	297.56 ± 0.34	182.73 ± 0.03	412.39 ± 0.75	77.61 ± 0.49	336.3 ± 1.52	238.6 ± 1.64	79.27 ± 1.77	244.69 ± 0.75	354.21 ± 1.03	181.65 ± 4.82
GFB1	142.65 ± 0.00	50 ± 0.7	72.29 ± 3.22	82.29 ± 47.51	65.83 ± 0.04	138.26 ± 0.31	34.74 ± 0.1	120.25 ± 0.94	29.29 ± 0.34	45.04 ± 0.25	32 ± 0.05	67.15 ± 0.07	38.67 ± 0.14	116.47 ± 0.54	14.29 ± 0.29	66.78 ± 0.03	65.6 ± 0.26	22.31 ± 0.83	68.87 ± 1	88.61 ± 2.83	72.82 ± 2.15
Corn	74.08 ± 0.11	34.39 ± 1.12	51.98 ± 0.27	20.46 ± 11.83	20.25 ± 0.12	37.47 ± 0.18	14.85 ± 0.06	28.47 ± 0.14	11.18 ± 0.24	20.3 ± 2.85	13.89 ± 0.45	27.82 ± 0.1	11.99 ± 0.03	45.5 ± 0.3	11.79 ± 0.38	61.19 ± 0.14	25.33 ± 0.28	4.32 ± 0.2	27.13 ± 0.22	71.65 ± 1.41	55.56 ± 0.56
Buckwheat	72.94 ± 0.76	36.22 ± 0.39	119.85 ± 1.09	21.77 ± 12.57	23.67 ± 0.22	54.51 ± 0.34	18.44 ± 0.33	108.29 ± 2.44	4.27 ± 0.08	10.96 ± 1.49	12.37 ± 0.28	23.13 ± 0.67	15.35 ± 0.41	37.11 ± 0.96	11.81 ± 0.17	34.22 ± 0.47	20.07 ± 0.49	10.26 ± 0.23	25.85 ± 0.69	8.28 ± 0.09	31.38 ± 0.35
Rice	87.24 ± 0.23	44.7 ± 0.39	91.11 ± 0.43	43.1 ± 24.89	46.62 ± 0.08	55.29 ± 0.21	18.45 ± 0.01	78.25 ± 0.33	9.54 ± 0.19	13.27 ± 2.64	20.82 ± 0.21	37.69 ± 0.3	13.99 ± 0.06	25.32 ± 0.23	11.31 ± 0.36	31.47 ± 0.04	36.29 ± 0.53	12.29 ± 3.49	29.11 ± 0.48	20.05 ± 0.72	45.39 ± 0.13

## Sheet: Millet Time Course
Extract Worts	Concentrations (mg/L)
L:G 3:1	Group A									Group B				Group C					Group D
	Aspartic Acid	Glutamic Acid	Asparagine	Serine	Glutamine	Threonine	Arginine	Methionine	Lysine	Histidine	Valine	Isoleucine	Leucine	Glycine	Alanine	Tyrosine	Tryptophan	Phenylalanine	Proline	GABA
FF-55 °C	92.9 ± 4.41	107.86 ± 10.55	211.08 ± 10.49	139.59 ± 7.27	384.28 ± 18.9	71.62 ± 4.15	186.9 ± 10.07	72.55 ± 4.04	74.03 ± 6.21	79.37 ± 3.61	140.03 ± 7.28	81.95 ± 4.38	239.35 ± 14.4	24.85 ± 1.38	125.99 ± 6.84	143.71 ± 8.54	43.85 ± 3.29	134.47 ± 8.65	255.39 ± 18.54	150.22 ± 3.92
FF-60 °C	90.58 ± 1.82	105.62 ± 2.2	205.61 ± 5.68	140.02 ± 4.12	383.12 ± 12.64	73.21 ± 2.28	189.43 ± 5.32	76.38 ± 2.51	86.55 ± 1.77	74.81 ± 0.91	144.61 ± 6.32	85.9 ± 3.38	253.96 ± 9.84	26.16 ± 0.65	129.91 ± 5.99	143.7 ± 5.02	56.46 ± 1.38	147.58 ± 3.67	259.29 ± 5.31	151.48 ± 7.77
FF-65 °C	92.05 ± 1.75	103.36 ± 2.14	209.19 ± 4.31	141.23 ± 2.44	383.08 ± 11.19	72.79 ± 0.73	185.29 ± 0.59	74.51 ± 0.88	81.93 ± 1.48	75.25 ± 0.67	142.55 ± 3.05	84.11 ± 1.21	247.46 ± 2.7	25.27 ± 0.05	129.43 ± 1.78	144.6 ± 1.45	49.81 ± 2.34	140.57 ± 0.36	272.36 ± 11.03	153.29 ± 2.86
FF-70 °C	81.04 ± 0.73	55.59 ± 2.88	225.03 ± 0.91	146.41 ± 0.01	383.1 ± 6.63	73.86 ± 0.71	166.88 ± 2.33	78.47 ± 0.57	72.33 ± 0.71	68.42 ± 2.98	153.16 ± 4.55	92.51 ± 2.32	249.02 ± 3.85	26.38 ± 0.04	142.58 ± 0.51	134.64 ± 2.93	41.92 ± 0.44	137.15 ± 1.81	257.93 ± 1.59	208.01 ± 4
CL	66.39 ± 1.57	75.8 ± 0	225.11 ± 6.23	150.03 ± 3.77	385.67 ± 8.95	77.99 ± 0.91	165.63 ± 1.51	81.35 ± 1.23	68.23 ± 2.81	74.04 ± 0.67	161.78 ± 0.2	96.86 ± 0.65	251.91 ± 3.21	29 ± 0.94	147.7 ± 2.11	139.97 ± 3.45	42.86 ± 2.39	139.21 ± 3.84	264.22 ± 5.55	223.92 ± 1.9
CL-SR	73.38 ± 2.99	74.42 ± 1	235.37 ± 5.5	155.72 ± 6.97	412.29 ± 14.05	81.44 ± 4.24	170.64 ± 10.81	83.89 ± 5.16	72.92 ± 9.24	75.27 ± 3.34	167.01 ± 7.53	100.52 ± 5.1	267.49 ± 18.53	30.31 ± 2.48	153.75 ± 10.03	143.89 ± 8.09	44.38 ± 1.23	147.63 ± 9.03	276.71 ± 4.14	225.48 ± 3.51
CL-Exo	74.05 ± 4.91	67.82 ± 1.94	224.58 ± 12.69	149.08 ± 6.86	389.13 ± 14.37	77.24 ± 1.8	164.81 ± 1.22	81.27 ± 1.79	73.27 ± 9.95	70.35 ± 2.41	153.47 ± 1.64	94.44 ± 1.63	261.96 ± 3.07	29.48 ± 1.25	148.41 ± 2.69	142.88 ± 3.48	46.42 ± 2.29	149.19 ± 3.32	254.47 ± 9.01	201.88 ± 6.91
Final Worts	Concentrations (mg/L)
L:G 6:1	Group A									Group B				Group C					Group D
	Aspartic Acid	Glutamic Acid	Asparagine	Serine	Glutamine	Threonine	Arginine	Methionine	Lysine	Histidine	Valine	Isoleucine	Leucine	Glycine	Alanine	Tyrosine	Tryptophan	Phenylalanine	Proline	GABA
Barley	59.13 ± 2.48	98.09 ± 1.08	107.54 ± 2.56	60.7 ± 3.12	202.79 ± 8.3	55.14 ± 3.26	147.39 ± 7.94	28.44 ± 2.26	63.57 ± 4.83	51.04 ± 1.7	114.51 ± 6.94	63.31 ± 3.94	155.14 ± 10.74	28.26 ± 1.46	95.16 ± 5.54	95.36 ± 5.15	42.42 ± 1.44	132.4 ± 6.71	498.66 ± 10.89	34.8 ± 2.19
FF-55 °C	61.22 ± 0.24	67.22 ± 2.83	137.42 ± 1.03	96.92 ± 0.91	220.87 ± 2.29	50.34 ± 0.68	143.02 ± 2.3	53.07 ± 0.36	67.2 ± 5.22	54.89 ± 1.41	96.97 ± 1.06	57.22 ± 0.87	176.24 ± 1.37	18.47 ± 0.43	96.88 ± 1.07	100.79 ± 2.04	34.44 ± 3.61	99.58 ± 2.59	169.34 ± 2.79	102.65 ± 3.11
FF-60 °C	62.63 ± 1.1	70.06 ± 1.17	139.71 ± 1.58	99.1 ± 1.23	208.16 ± 3.91	51.83 ± 0.51	145.24 ± 0.1	54.42 ± 0.26	68.01 ± 3.72	55.13 ± 0.1	102.63 ± 1.92	59.93 ± 0.83	186.32 ± 0.95	19.31 ± 0.48	98.72 ± 0.77	106.05 ± 0.38	42.73 ± 0.37	108.12 ± 0.35	179.41 ± 12.64	104.46 ± 0.19
FF-65 °C	64.84 ± 0.57	66.52 ± 1.11	142.29 ± 0.41	97.83 ± 2.01	210.54 ± 0.23	50.55 ± 0.04	135.64 ± 0.51	51.01 ± 0.06	65.76 ± 1.66	54.82 ± 0.83	94.39 ± 0.19	56.33 ± 0.2	174.28 ± 0.96	19.14 ± 0.08	94.98 ± 0.32	102.66 ± 0.4	38.71 ± 1.35	101.41 ± 1.19	174.85 ± 0.55	103.98 ± 1.03
FF-70 °C	53.16 ± 0.06	37.74 ± 1.47	146.32 ± 1.09	96.4 ± 0.3	198.7 ± 1.13	48.84 ± 0.06	121.76 ± 0.44	51.93 ± 0.07	48.49 ± 2.25	50.63 ± 0.61	102.75 ± 0.71	61.19 ± 0.02	168.97 ± 0.16	18.19 ± 0.03	96.95 ± 0.14	91.61 ± 0.59	30.95 ± 0.78	94.29 ± 0.13	156.3 ± 4.02	137.09 ± 1.08
CL	49.62 ± 2	56.38 ± 2.11	159.48 ± 4.3	108.97 ± 4.48	233.47 ± 3.95	56.41 ± 2.26	130.94 ± 3.69	58.81 ± 1.9	57.93 ± 5.67	57.68 ± 2.25	114.27 ± 3.16	68.11 ± 2.21	186.08 ± 5.18	22.76 ± 1.34	110.23 ± 4.03	102.05 ± 3.51	35.19 ± 1.51	104.8 ± 3.37	179.72 ± 9.46	156.8 ± 4.71
CL-SR	48.54 ± 0.1	48.86 ± 0.01	147.42 ± 2.47	101.34 ± 0.83	225.51 ± 1.71	53.52 ± 1.66	125.78 ± 5.59	55.67 ± 2.04	49.4 ± 1.14	53.06 ± 1.31	108.49 ± 4.04	64.89 ± 2.45	182.38 ± 9.5	20.94 ± 0.5	105.61 ± 4.22	97.4 ± 2.51	33.7 ± 0.13	102.73 ± 3.19	161.38 ± 2.01	141.11 ± 1.34
CL-Exo	52.16 ± 0.11	50.96 ± 1	154.65 ± 0.74	105.02 ± 1.8	213.51 ± 0.72	55.81 ± 1.33	132.26 ± 2.24	59.02 ± 1.05	49.9 ± 4.25	53.59 ± 1.92	113.34 ± 0.71	67.99 ± 0.12	194.47 ± 2.85	21.28 ± 0.23	110.11 ± 3.09	103.44 ± 0.06	34.82 ± 1.39	109.45 ± 0.29	172.1 ± 5.78	141.89 ± 0.84
XT	63.42 ± 0.26	57.75 ± 0.24	114.84 ± 0.24	95.44 ± 0.72	206.08 ± 1.72	57.53 ± 0.78	156.04 ± 1.93	58.3 ± 0.68	86.1 ± 0.09	53.29 ± 0.46	109.1 ± 1.46	64.48 ± 0.76	196.61 ± 1.53	24.63 ± 0.2	113.18 ± 1.34	103.34 ± 1.15	32.18 ± 0.45	108.45 ± 0.85	147.49 ± 2.33	106.62 ± 0.95
IE	41.6 ± 1.56	85.69 ± 0.62	101.57 ± 2.09	58.56 ± 0.72	158.6 ± 0.82	25.08 ± 0.25	59.64 ± 0.44	23.64 ± 0.52	0 ± 0	36.4 ± 0.01	49.9 ± 0.72	29.37 ± 0.17	73.32 ± 0.52	7.23 ± 0.4	39.73 ± 0.77	56.02 ± 0.76	19.92 ± 0.54	45.72 ± 0.72	117.12 ± 0.86	52.4 ± 1.5
Final Worts
L:G 6:1
	FAN (mg/L)	Percent Nitrogen
Barley	201.34 ± 9.94	0.113 ± 0.006
FF-55 °C	192.9 ± 1.92	0.061 ± 0.004
FF-60 °C	203.03 ± 2.03	0.069 ± 0.002
FF-65 °C	193.14 ± 0.90	0.055 ± 0.002
FF-70 °C	197.61 ± 0.23	0.064 ± 0.002
CL	213.67 ± 7.48	0.069 ± 0.006
CL-SR	204.34 ± 11.73	0.065 ± 0.006
CL-Exo	211.22 ± 2.68	0.071 ± 0.005
XT	201.28 ± 4.51	0.072 ± 0.000
IE	119.73 ± 12.48	0.038 ± 0.008

## Sheet: CL-40 °C
Extract Worts
L:G 3:1	Concentrations (mg/L)
	Group A									Group B				Group C					Group D
CL-40 °C	Aspartic Acid	Glutamic Acid	Asparagine	Serine	Glutamine	Threonine	Arginine	Methionine	Lysine	Histidine	Valine	Isoleucine	Leucine	Glycine	Alanine	Tyrosine	Tryptophan	Phenylalanine	Proline	GABA
30 min	62.33 ± 0.5	75.76 ± 2.74	213.02 ± 3.35	136.96 ± 2.82	367.6 ± 5.54	65.26 ± 1.23	128.61 ± 0.33	68.23 ± 0.92	51.95 ± 1.55	62 ± 0.4	130.73 ± 0.1	82.55 ± 0.81	208.91 ± 1.3	24.48 ± 0.55	122.94 ± 2.32	120.39 ± 2.1	43.22 ± 8.76	123.4 ± 2.82	195.38 ± 0.33	245.87 ± 20.12
60 min	70.42 ± 2.2	58.49 ± 2.83	224.12 ± 6.92	157.48 ± 5.62	392.46 ± 1.24	79.28 ± 0.51	168.13 ± 2.8	81.98 ± 1.98	98.41 ± 17.1	70.62 ± 0.09	149.48 ± 9.2	95.44 ± 3.27	259.88 ± 6.84	33.33 ± 2.38	155.93 ± 1.98	144.24 ± 0.38	49.25 ± 5.36	151.61 ± 3.36	228.45 ± 4.15	260.37 ± 2.87
90 min	73.97 ± 2.94	48.75 ± 2.36	222.08 ± 6.19	166.5 ± 4	400.18 ± 4.55	89.21 ± 1.25	195.4 ± 2.82	93.39 ± 1.23	112.63 ± 15.93	75.63 ± 1.99	169.76 ± 2.48	106.77 ± 0.2	296.49 ± 4.44	37.45 ± 1.89	179.1 ± 3.35	157.02 ± 4.75	49.97 ± 11.16	168.98 ± 7.91	241.71 ± 4.22	272.83 ± 4.07
120 min	81.32 ± 4.42	44.47 ± 2.5	229.58 ± 7.54	182.34 ± 5.5	427.75 ± 3.28	101.66 ± 1.97	223.46 ± 3.26	105.42 ± 1.68	138.44 ± 17.15	82.85 ± 2.3	187.22 ± 2.56	118.51 ± 0.17	336.36 ± 3.99	44.5 ± 2.38	207.56 ± 5.05	173.94 ± 5.11	53.3 ± 10.65	189.88 ± 8.93	262.62 ± 4.39	285.98 ± 4.82
Extract Worts
L:G 3:1	Concentrations (mg/L)
	Group A									Group B				Group C					Group D
CL-Exo 40 °C	Aspartic Acid	Glutamic Acid	Asparagine	Serine	Glutamine	Threonine	Arginine	Methionine	Lysine	Histidine	Valine	Isoleucine	Leucine	Glycine	Alanine	Tyrosine	Tryptophan	Phenylalanine	Proline	GABA
30 min	65 ± 0.02	76.66 ± 0.28	209.51 ± 2.21	132.55 ± 3.27	360.63 ± 4.91	63.25 ± 0.77	124.25 ± 0.23	65.7 ± 0.74	46.3 ± 1.66	57.38 ± 2.29	124.91 ± 1.33	78.34 ± 1.14	203.88 ± 1.33	23.81 ± 0.34	120.14 ± 0.21	117.96 ± 2.42	34.64 ± 1.03	118.53 ± 1.45	180.09 ± 2.57	222.21 ± 11.23
60 min	72.92 ± 0.8	62.24 ± 0.02	222.77 ± 0.48	153.24 ± 0.67	373.78 ± 5.45	75.74 ± 1.54	158.74 ± 3.34	78.54 ± 2.58	83.77 ± 11.5	66.41 ± 0.66	139.26 ± 6.33	88.93 ± 2.65	245.25 ± 5.24	31.94 ± 0.35	149.51 ± 1.2	138.44 ± 2.12	41.57 ± 0.87	143.99 ± 2.57	207.03 ± 2.93	238 ± 1.85
90 min	75.11 ± 2.04	52.27 ± 0.27	218.68 ± 4.17	160.39 ± 3.41	395.6 ± 0.73	84.89 ± 1	186.75 ± 0.56	89.22 ± 1.11	100.74 ± 6.35	70.67 ± 1.62	157.84 ± 2.67	99.46 ± 0.64	282.71 ± 2.77	35.37 ± 1.98	170.69 ± 2.91	149.73 ± 3.57	42.53 ± 3.63	160.25 ± 4.05	222.96 ± 2.03	258.23 ± 9.73
120 min	83.34 ± 0.96	48.41 ± 1.31	228.47 ± 1.89	175.88 ± 1.84	416.19 ± 7.48	95.1 ± 1.38	211.21 ± 4.71	99.6 ± 1.05	130.93 ± 15.44	78.83 ± 1.1	170.21 ± 4.37	108.37 ± 1.84	316.75 ± 4.02	41.61 ± 0.44	195.65 ± 2.96	165.76 ± 0.25	49.44 ± 4.21	181.42 ± 1.23	235.7 ± 0.19	285.21 ± 7.73
Extract Worts
L:G 3:1
	FAN (mg/L)	Percent Nitrogen
CL-40 °C-120 min	512.37 ± 15.8	0.14 ± 0.007
CL-Exo 40 °C-120 min	424.26 ± 1.81	0.115 ± 0.002
